# Supplementary material for: Armillaria altimontana in North America: Biology and Ecology
Source: MDPI journal article supplement (doi:10.3390/jof9090904), 2023-09-04
Supplement: s1 [file s1]

**Supplemental Table S1.**

*Armillaria altimontana* isolates from the western United States with location, host, and collector information.

| Isolate ID         | Latitude | Longitude  | State   | Host(s)/Association(s)                                                                                                                                                                                           | Collectors            |
|--------------------|----------|------------|---------|------------------------------------------------------------------------------------------------------------------------------------------------------------------------------------------------------------------|-----------------------|
| Deerlodge - 8a     | 46.24    | -113.64    | Montana | <i>Alnus</i> sp.<br><i>Pinus contorta</i>                                                                                                                                                                        | Geral McDonald et al. |
| Couer d'Alene - 1  | 47.79    | -116.15    | Idaho   | <i>Abies grandis</i><br><i>Acer glabrum</i><br><i>Tsuga heterophylla</i><br><i>Vaccinium globulare</i><br>soil                                                                                                   | Geral McDonald et al. |
| Couer d'Alene - 2  | 47.74145 | -116.42654 | Idaho   | <i>Abies grandis</i><br><i>Holodiscus discolor</i><br><i>Tsuga heterophylla</i><br>soil                                                                                                                          | Geral McDonald et al. |
| Couer d'Alene D 3  | 47.87226 | -115.97509 | Idaho   | <i>Abies grandis</i><br><i>Acer glabrum</i><br><i>Pseudotsuga menziesii</i><br><i>Salix</i> sp.<br>soil                                                                                                          | Geral McDonald et al. |
| Couer d'Alene - 5  | 47.45455 | -116.07646 | Idaho   | <i>Alnus</i> sp.<br><i>Abies grandis</i><br><i>Acer glabrum</i><br><i>Holodiscus discolor</i><br><i>Larix occidentalis</i><br><i>Pinus monticola</i><br><i>Pseudotsuga menziesii</i><br><i>Salix</i> sp.<br>soil | Geral McDonald et al. |
| Couer d'Alene - 7a | 47.55967 | -116.63242 | Idaho   | <i>Abies grandis</i><br><i>Thuja plicata</i><br><i>Tsuga heterophylla</i>                                                                                                                                        | Geral McDonald et al. |
| Couer d'Alene - 8  | 47.85773 | -116.56739 | Idaho   | <i>Acer glabrum</i><br><i>Holodiscus discolor</i><br><i>Pseudotsuga menziesii</i>                                                                                                                                | Geral McDonald et al. |
| Boise - 2b         | 44.59208 | -115.83505 | Idaho   | <i>Abies grandis</i><br><i>Abies lasiocarpa</i><br><i>Alnus</i> sp.<br><i>Larix occidentalis</i><br><i>Picea engelmannii</i><br><i>Salix</i> sp.                                                                 | Geral McDonald et al. |
| Payette - 1b       | 44.48    | -116.27    | Idaho   | <i>Pinus ponderosa</i><br><i>Rosa gymnocarpa</i>                                                                                                                                                                 | Geral McDonald et al. |
| Payette - 4a       | 44.93891 | -115.31355 | Idaho   | <i>Cornus stolonifera</i><br><i>Vaccinium globulare</i>                                                                                                                                                          | Geral McDonald et al. |
| Payette - 7a       | 44.81456 | -116.63115 | Idaho   | <i>Amelanchier alnifolia</i><br><i>Pinus ponderosa</i><br><i>Prunus virginiana</i>                                                                                                                               | Geral McDonald et al. |

|               |          |            |       |                              |                       |
|---------------|----------|------------|-------|------------------------------|-----------------------|
| Nez Perce - 2 | 45.87328 | -115.78073 | Idaho | <i>Pseudotsuga menziesii</i> | Geral McDonald et al. |
|               |          |            |       | <i>Abies grandis</i>         |                       |
|               |          |            |       | <i>Amelanchier alnifolia</i> |                       |
|               |          |            |       | <i>Pinus ponderosa</i>       |                       |
| Nez Perce - 3 | 46.0602  | -115.69107 | Idaho | soil                         | Geral McDonald et al. |
|               |          |            |       | <i>Abies grandis</i>         |                       |
|               |          |            |       | <i>Acer glabrum</i>          |                       |
|               |          |            |       | <i>Amelanchier alnifolia</i> |                       |
| Nez Perce - 4 | 45.87603 | -115.77765 | Idaho | <i>Taxus brevifolia</i>      | Geral McDonald et al. |
|               |          |            |       | <i>Thuja plicata</i>         |                       |
|               |          |            |       | soil                         |                       |
|               |          |            |       | <i>Abies grandis</i>         |                       |
| Nez Perce - 5 | 46.4033  | -115.51975 | Idaho | <i>Acer glabrum</i>          | Geral McDonald et al. |
|               |          |            |       | <i>Amelanchier alnifolia</i> |                       |
|               |          |            |       | <i>Pseudotsuga menziesii</i> |                       |
|               |          |            |       | <i>Xerophyllum tenax</i>     |                       |
| Nez Perce - 6 | 45.58564 | -116.03269 | Idaho | <i>Abies grandis</i>         | Geral McDonald et al. |
|               |          |            |       | <i>Larix occidentalis</i>    |                       |
|               |          |            |       | <i>Picea engelmannii</i>     |                       |
|               |          |            |       | <i>Pinus contorta</i>        |                       |
| Nez Perce - 7 | 45.6495  | -115.59648 | Idaho | <i>Pseudotsuga menziesii</i> | Geral McDonald et al. |
|               |          |            |       | <i>Xerophyllum tenax</i>     |                       |
|               |          |            |       | soil                         |                       |
|               |          |            |       | <i>Abies lasiocarpa</i>      |                       |
| Nez Perce - 8 | 45.77058 | -115.36798 | Idaho | <i>Picea engelmannii</i>     | Geral McDonald et al. |
|               |          |            |       | soil                         |                       |
|               |          |            |       | <i>Abies grandis</i>         |                       |
|               |          |            |       | <i>Abies lasiocarpa</i>      |                       |
| Kaniksu - 5   | 48.1985  | -116.13812 | Idaho | <i>Acer glabrum</i>          | Geral McDonald et al. |
|               |          |            |       | <i>Alnus</i> sp.             |                       |
|               |          |            |       | <i>Pseudotsuga menziesii</i> |                       |
|               |          |            |       | <i>Sorbus</i> sp.            |                       |
| Kaniksu - 6   | 48.47576 | -116.39545 | Idaho | soil                         | Geral McDonald et al. |
|               |          |            |       | <i>Holodiscus discolor</i>   |                       |
|               |          |            |       | <i>Pinus contorta</i>        |                       |
|               |          |            |       | <i>Pseudotsuga menziesii</i> |                       |
| St.Joe - 1    | 47.35566 | -115.8652  | Idaho | <i>Prunus emarginata</i>     | Geral McDonald et al. |
|               |          |            |       | <i>Pseudotsuga menziesii</i> |                       |
|               |          |            |       | <i>Thuja plicata</i>         |                       |
|               |          |            |       | <i>Amelanchier alnifolia</i> |                       |
| St.Joe - 3    | 46.86869 | -116.18814 | Idaho | <i>Ceanothus velutinus</i>   | Geral McDonald et al. |
|               |          |            |       | <i>Abies grandis</i>         |                       |
|               |          |            |       | <i>Acer glabrum</i>          |                       |
|               |          |            |       | <i>Alnus</i> sp.             |                       |
| St.Joe - 4    | 47.39651 | -115.91712 | Idaho | <i>Pseudotsuga menziesii</i> | Geral McDonald et al. |
|               |          |            |       | <i>Thuja plicata</i>         |                       |
|               |          |            |       | <i>Amelanchier alnifolia</i> |                       |
|               |          |            |       | <i>Ceanothus velutinus</i>   |                       |

|                     |          |            |            |                              |                       |
|---------------------|----------|------------|------------|------------------------------|-----------------------|
|                     |          |            |            | <i>Prunus emarginata</i>     |                       |
| St.Joe - 5          | 46.92623 | -116.59932 | Idaho      | <i>Abies grandis</i>         | Geral McDonald et al. |
|                     |          |            |            | <i>Acer</i> sp.              |                       |
|                     |          |            |            | <i>Pinus monticola</i>       |                       |
|                     |          |            |            | <i>Pseudotsuga menziesii</i> |                       |
|                     |          |            |            | <i>Thuja plicata</i>         |                       |
| St.Joe - 7          | 47.19933 | -115.46023 | Idaho      | <i>Abies grandis</i>         | Geral McDonald et al. |
|                     |          |            |            | <i>Abies lasiocarpa</i>      |                       |
|                     |          |            |            | <i>Alnus</i> sp.             |                       |
|                     |          |            |            | <i>Pseudotsuga menziesii</i> |                       |
|                     |          |            |            | soil                         |                       |
| Colville - 1        | 48.63559 | -117.77462 | Washington | <i>Amelanchier alnifolia</i> | Geral McDonald et al. |
| Colville - 4        | 48.88078 | -117.11522 | Washington | <i>Acer glabrum</i>          | Geral McDonald et al. |
|                     |          |            |            | <i>Pinus contorta</i>        |                       |
| Colville - 7        | 48.62882 | -118.26113 | Washington | <i>Alnus</i> sp.             | Geral McDonald et al. |
|                     |          |            |            | <i>Larix occidentalis</i>    |                       |
|                     |          |            |            | <i>Pinus contorta</i>        |                       |
|                     |          |            |            | <i>Pseudotsuga menziesii</i> |                       |
|                     |          |            |            | <i>Shepherdia canadensis</i> |                       |
|                     |          |            |            | soil                         |                       |
| Colville - 8        | 48.82262 | -117.54915 | Washington | <i>Abies grandis</i>         | Geral McDonald et al. |
|                     |          |            |            | <i>Acer glabrum</i>          |                       |
|                     |          |            |            | <i>Alnus</i> sp.             |                       |
|                     |          |            |            | <i>Amelanchier alnifolia</i> |                       |
|                     |          |            |            | <i>Larix occidentalis</i>    |                       |
|                     |          |            |            | <i>Thuja plicata</i>         |                       |
|                     |          |            |            | soil                         |                       |
| Umitilla - 1a       | 44.95121 | -118.73723 | Oregon     | <i>Abies grandis</i>         | Geral McDonald et al. |
|                     |          |            |            | <i>Larix occidentalis</i>    |                       |
|                     |          |            |            | <i>Pseudotsuga menziesii</i> |                       |
| Umitilla - 2        | 46.1551  | -117.40567 | Washington | <i>Abies grandis</i>         | Geral McDonald et al. |
| Umitilla - 3        | 44.80322 | -118.57125 | Oregon     | <i>Abies grandis</i>         | Geral McDonald et al. |
| Umitilla - 4        | 45.0929  | -119.30239 | Oregon     | <i>Larix occidentalis</i>    | Geral McDonald et al. |
|                     |          |            |            | <i>Pinus contorta</i>        |                       |
|                     |          |            |            | <i>Pinus ponderosa</i>       |                       |
| Umitilla - 6        | 45.94841 | -117.62629 | Oregon     | <i>Pinus ponderosa</i>       | Geral McDonald et al. |
|                     |          |            |            | hardwood                     |                       |
|                     |          |            |            | soil                         |                       |
| Umitilla - 7        | 45.76653 | -118.09682 | Oregon     | <i>Abies lasiocarpa</i>      | Geral McDonald et al. |
|                     |          |            |            | <i>Picea engelmannii</i>     |                       |
| Wallowa Whitman - 2 | 45.08919 | -117.61189 | Oregon     | <i>Larix occidentalis</i>    | Geral McDonald et al. |
|                     |          |            |            | <i>Alnus</i> sp.             |                       |
|                     |          |            |            | <i>Pseudotsuga menziesii</i> |                       |
|                     |          |            |            | soil                         |                       |
| Wallowa Whitman - 3 | 45.45667 | -118.18261 | Oregon     | <i>Abies grandis</i>         | Geral McDonald et al. |
|                     |          |            |            | <i>Acer glabrum</i>          |                       |
|                     |          |            |            | <i>Larix occidentalis</i>    |                       |

|                      |          |            |         |                              |                       |
|----------------------|----------|------------|---------|------------------------------|-----------------------|
|                      |          |            |         | <i>Picea engelmannii</i>     |                       |
| Wallowa Whitman - 4a | 45.7772  | -117.28027 | Oregon  | <i>Abies grandis</i>         | Geral McDonald et al. |
| Wallowa Whitman - 5  | 45.37662 | -117.33785 | Oregon  | <i>Alnus</i> sp.             | Geral McDonald et al. |
|                      |          |            |         | <i>Picea engelmannii</i>     |                       |
|                      |          |            |         | <i>Salix</i> sp.             |                       |
| Lolo - 5             | 46.80952 | -114.44147 | Montana | <i>Salix</i> sp.             | Geral McDonald et al. |
|                      |          |            |         | <i>Amelanchier alnifolia</i> |                       |
|                      |          |            |         | <i>Larix occidentalis</i>    |                       |
|                      |          |            |         | <i>Pinus contorta</i>        |                       |
|                      |          |            |         | <i>Pseudotsuga menziesii</i> |                       |
|                      |          |            |         | <i>Xerophyllum tenax</i>     |                       |
| Lolo - 6             | 47.61346 | -115.16873 | Montana | <i>Salix</i> sp.             | Geral McDonald et al. |
| Lolo - 7             | 47.40159 | -115.14411 | Montana | <i>Abies grandis</i>         | Geral McDonald et al. |
|                      |          |            |         | <i>Amelanchier alnifolia</i> |                       |
|                      |          |            |         | <i>Picea engelmannii</i>     |                       |
| Kootenai - 3         | 48.0645  | -115.89574 | Montana | <i>Holodiscus discolor</i>   | Geral McDonald et al. |
|                      |          |            |         | <i>Pseudotsuga menziesii</i> |                       |
|                      |          |            |         | soil                         |                       |
| Kootenai - 4         | 48.56643 | -114.79008 | Montana | <i>Alnus</i> sp.             | Geral McDonald et al. |
|                      |          |            |         | <i>Abies grandis</i>         |                       |
|                      |          |            |         | <i>Picea engelmannii</i>     |                       |
|                      |          |            |         | <i>Pinus contorta</i>        |                       |
|                      |          |            |         | <i>Pseudotsuga menziesii</i> |                       |
| Kootenai - 6b        | 48.26979 | -114.86638 | Montana | <i>Salix</i> sp.             | Geral McDonald et al. |
| Kootenai - 7         | 48.9499  | -115.37767 | Montana | <i>Alnus</i> sp.             | Geral McDonald et al. |
|                      |          |            |         | <i>Lonicera utahensis</i>    |                       |
|                      |          |            |         | <i>Picea engelmannii</i>     |                       |
|                      |          |            |         | <i>Pseudotsuga menziesii</i> |                       |
|                      |          |            |         | <i>Sorbus</i> sp.            |                       |
| Kootenai - 8         | 48.27549 | -114.8446  | Montana | <i>Alnus</i> sp.             | Geral McDonald et al. |
| Flathead - 2         | 48.29473 | -114.0207  | Montana | <i>Acer glabrum</i>          | Geral McDonald et al. |
| Flathead - 3         | 47.91962 | -113.48981 | Montana | <i>Betula papyrifera</i>     | Geral McDonald et al. |
| Flathead - 4         | 47.89342 | -113.71128 | Montana | <i>Abies lasiocarpa</i>      | Geral McDonald et al. |
|                      |          |            |         | <i>Acer glabrum</i>          |                       |
|                      |          |            |         | <i>Alnus</i> sp.             |                       |
|                      |          |            |         | <i>Larix occidentalis</i>    |                       |
|                      |          |            |         | <i>Pseudotsuga menziesii</i> |                       |
| Flathead - 5         | 47.43331 | -113.57805 | Montana | <i>Amelanchier alnifolia</i> | Geral McDonald et al. |
| Flathead - 6         | 48.0188  | -113.62325 | Montana | <i>Abies lasiocarpa</i>      | Geral McDonald et al. |
|                      |          |            |         | <i>Alnus</i> sp.             |                       |
|                      |          |            |         | <i>Larix occidentalis</i>    |                       |
|                      |          |            |         | <i>Picea engelmannii</i>     |                       |
|                      |          |            |         | <i>Xerophyllum tenax</i>     |                       |
| Flathead - 7         | 48.4274  | -114.81378 | Montana | <i>Abies grandis</i>         | Geral McDonald et al. |
|                      |          |            |         | <i>Larix occidentalis</i>    |                       |
|                      |          |            |         | <i>Picea engelmannii</i>     |                       |
|                      |          |            |         | soil                         |                       |

|                 |          |            |         |                                               |                       |
|-----------------|----------|------------|---------|-----------------------------------------------|-----------------------|
| Bitterroot - 1  | 46.66    | -113.85    | Montana | soil                                          | Geral McDonald et al. |
| Bitterroot - 2  | 46.19919 | -113.85256 | Montana | <i>Alnus</i> sp.                              | Geral McDonald et al. |
|                 |          |            |         | <i>Amelanchier alnifolia</i>                  |                       |
|                 |          |            |         | soil                                          |                       |
| Bitterroot D 3a | 45.56039 | -114.18839 | Montana | <i>Abies lasiocarpa</i>                       | Geral McDonald et al. |
|                 |          |            |         | <i>Amelanchier alnifolia</i>                  |                       |
|                 |          |            |         | <i>Pinus contorta</i>                         |                       |
| Clearwater - 2  | 46.71736 | -115.08467 | Idaho   | <i>Pinus monticola</i>                        | Geral McDonald et al. |
| Clearwater - 4  | 46.4744  | -114.97837 | Idaho   | <i>Abies grandis</i>                          | Geral McDonald et al. |
|                 |          |            |         | <i>Acer glabrum</i>                           |                       |
|                 |          |            |         | <i>Holodiscus discolor</i>                    |                       |
|                 |          |            |         | <i>Prunus emarginata</i>                      |                       |
|                 |          |            |         | <i>Pseudotsuga menziesii</i>                  |                       |
|                 |          |            |         | soil                                          |                       |
| Clearwater - 7  | 46.39437 | -115.59563 | Idaho   | <i>Abies grandis</i>                          | Geral McDonald et al. |
|                 |          |            |         | <i>Acer glabrum</i>                           |                       |
|                 |          |            |         | <i>Menziesia ferruginea</i>                   |                       |
|                 |          |            |         | <i>Picea engelmannii</i>                      |                       |
|                 |          |            |         | <i>Pseudotsuga menziesii</i>                  |                       |
|                 |          |            |         | <i>Taxus brevifolia</i>                       |                       |
|                 |          |            |         | soil                                          |                       |
| Clearwater - 8  | 46.65686 | -115.3763  | Idaho   | <i>Pinus contorta</i>                         | Geral McDonald et al. |
| P1              | 44.45123 | -121.70123 | Oregon  | <i>Abies concolor/Abies grandis</i>           | Arron Smith et al.    |
| P3              | 44.42195 | -121.90587 | Oregon  | <i>Abies concolor/Abies grandis</i>           | Arron Smith et al.    |
|                 |          |            |         | <i>Tsuga mertensiana</i>                      |                       |
| P8              | 42.28895 | -122.08923 | Oregon  | <i>Abies</i> sp.                              | Arron Smith et al.    |
| P9              | 42.324   | -122.19548 | Oregon  | <i>Abies concolor/Abies grandis</i>           | Arron Smith et al.    |
| P10             | 42.4394  | -122.1829  | Oregon  | <i>Abies concolor/Abies grandis</i>           | Arron Smith et al.    |
|                 |          |            |         | <i>Pinus ponderosa</i>                        |                       |
|                 |          |            |         | <i>Pseudotsuga menziesii</i>                  |                       |
| P11             | 42.52818 | -122.16928 | Oregon  | <i>Abies</i> sp.                              | Arron Smith et al.    |
|                 |          |            |         | <i>Tsuga mertensiana</i>                      |                       |
| P14             | 42.64923 | -122.12595 | Oregon  | <i>Abies magnifica</i> var. <i>shastensis</i> | Arron Smith et al.    |
| P15             | 42.71558 | -122.08303 | Oregon  | <i>Abies concolor/Abies grandis</i>           | Arron Smith et al.    |
|                 |          |            |         | <i>Pinus ponderosa</i>                        |                       |
|                 |          |            |         | <i>Ribes</i> sp.                              |                       |
| P18             | 42.3786  | -121.67065 | Oregon  | <i>Abies concolor/Abies grandis</i>           | Arron Smith et al.    |
| P22             | 42.60447 | -121.55903 | Oregon  | <i>Abies concolor/Abies grandis</i>           | Arron Smith et al.    |
|                 |          |            |         | <i>Pinus lambertiana</i>                      |                       |
|                 |          |            |         | <i>Purshia tridentata</i>                     |                       |
| P28             | 42.67978 | -121.40247 | Oregon  | <i>Pinus ponderosa</i>                        | Arron Smith et al.    |
| P37             | 42.80003 | -121.92159 | Oregon  | <i>Abies</i> sp.                              | Arron Smith et al.    |
| P39             | 43.06332 | -121.58838 | Oregon  | <i>Pinus ponderosa</i>                        | Arron Smith et al.    |
| P45             | 43.17817 | -121.96593 | Oregon  | <i>Abies magnifica</i> var. <i>shastensis</i> | Arron Smith et al.    |
|                 |          |            |         | <i>Pinus contorta</i>                         |                       |
| P47             | 43.30132 | -121.48928 | Oregon  | <i>Abies concolor/Abies grandis</i>           | Arron Smith et al.    |
|                 |          |            |         | <i>Castanopsis chrysophylla</i>               |                       |

|                       |          |            |            |                                                                                                                                                     |                               |
|-----------------------|----------|------------|------------|-----------------------------------------------------------------------------------------------------------------------------------------------------|-------------------------------|
| P52                   | 43.45297 | -121.97802 | Oregon     | <i>Abies concolor</i> / <i>Abies grandis</i><br><i>Tsuga mertensiana</i>                                                                            | Arron Smith et al.            |
| P61                   | 43.7277  | -121.60357 | Oregon     | <i>Arctostaphylos patula</i><br><i>Castanopsis chrysophylla</i><br><i>Ceanothus velutinus</i><br><i>Pinus lambertiana</i><br><i>Pinus ponderosa</i> | Arron Smith et al.            |
| P62                   | 43.39163 | -121.48583 | Oregon     | <i>Pinus ponderosa</i>                                                                                                                              | Arron Smith et al.            |
| P67                   | 43.6867  | -120.99532 | Oregon     | <i>Arctostaphylos patula</i>                                                                                                                        | Arron Smith et al.            |
| P75                   | 43.68498 | -121.33068 | Oregon     | <i>Abies concolor</i> / <i>Abies grandis</i><br><i>Pinus ponderosa</i>                                                                              | Arron Smith et al.            |
| P105                  | 44.35388 | -121.73672 | Oregon     | <i>Abies concolor</i> / <i>Abies grandis</i><br><i>Amelanchier alnifolia</i><br><i>Picea engelmannii</i><br><i>Pseudotsuga menziesii</i>            | Arron Smith et al.            |
| WO006F (JB6F)         | 42.42234 | -122.38093 | Oregon     | <i>Abies</i> sp.                                                                                                                                    | Josh Bronson                  |
| WO030R (Elk Creek 1R) | 43.65617 | -122.21479 | Oregon     | rotten snag                                                                                                                                         | John Hanna                    |
| WO059R (Tillimook 1R) | 45.62451 | -123.37464 | Oregon     | <i>Alnus</i> sp.                                                                                                                                    | John Hanna                    |
| WO077R (SOR#6)        | 42.77053 | -122.48888 | Oregon     | <i>Pseudotsuga menziesii</i>                                                                                                                        | Mee-Sook Kim and Josh Bronson |
| WO079R (SOR#9)        | 42.84441 | -122.48045 | Oregon     | <i>Pseudotsuga menziesii</i>                                                                                                                        | Mee-Sook Kim and Josh Bronson |
| Bovill Cemetary       | 46.85    | -116.41083 | Idaho      | <i>Abies grandis</i><br><i>Acer glabrum</i><br><i>Amelanchier alnifolia</i><br><i>Holodiscus discolor</i><br><i>Pseudotsuga menziesii</i>           | Terry Shaw et al.             |
| Dick's Creek          | 46.60778 | -116.33528 | Idaho      | <i>Abies grandis</i><br><i>Pseudotsuga menziesii</i><br><i>Salix scouleriana</i>                                                                    | Terry Shaw et al.             |
| Grasshopper           | 46.45    | -115.84805 | Idaho      | <i>Abies grandis</i><br><i>Pseudotsuga menziesii</i>                                                                                                | Terry Shaw et al.             |
| Huckleberry           | 48.2251  | -117.93155 | Washington | <i>Abies grandis</i>                                                                                                                                | Terry Shaw et al.             |
| Kennally              | 44.69006 | -115.98618 | Idaho      | <i>Pinus ponderosa</i>                                                                                                                              | Terry Shaw et al.             |
| Newport               | 48.26139 | -117.16111 | Washington | <i>Pinus contorta</i><br><i>Pinus ponderosa</i>                                                                                                     | Terry Shaw et al.             |
| Pivash Creek          | 46.86083 | -116.25833 | Idaho      | <i>Abies grandis</i><br><i>Prunus emarginata</i><br><i>Pseudotsuga menziesii</i>                                                                    | Terry Shaw et al.             |
| Scofield Divide       | 46.68278 | -115.74667 | Idaho      | <i>Pseudotsuga menziesii</i>                                                                                                                        | Terry Shaw et al.             |
| Skookum Lake          | 48.40111 | -117.18945 | Washington | <i>Pseudotsuga menziesii</i>                                                                                                                        | Terry Shaw et al.             |
| Soldier Creek         | 47.20218 | -116.45376 | Idaho      | <i>Abies grandis</i><br><i>Pseudotsuga menziesii</i><br><i>Tsuga heterophylla</i>                                                                   | Terry Shaw et al.             |
| Sportsman Access      | 47.22695 | -116.51777 | Idaho      | <i>Abies grandis</i>                                                                                                                                | Terry Shaw et al.             |
| Stanton               | 46.91441 | -115.91656 | Idaho      | <i>Abies grandis</i><br><i>Acer glabrum</i><br><i>Pseudotsuga menziesii</i>                                                                         | Terry Shaw et al.             |
| Upper Pataha          | 46.24111 | -117.57611 | Washington | <i>Abies grandis</i>                                                                                                                                | Terry Shaw et al.             |

|                             |          |            |            |                              |                                |
|-----------------------------|----------|------------|------------|------------------------------|--------------------------------|
|                             |          |            |            | <i>Pinus ponderosa</i>       |                                |
|                             |          |            |            | <i>Ribes cereum</i>          |                                |
| Vay                         | 48.11913 | -116.82207 | Idaho      | <i>Pinus contorta</i>        | Terry Shaw et al.              |
| Whiskey Butte               | 46.59139 | -115.94695 | Idaho      | <i>Abies grandis</i>         | Terry Shaw et al.              |
|                             |          |            |            | <i>Amelanchier alnifolia</i> |                                |
|                             |          |            |            | <i>Holodiscus discolor</i>   |                                |
|                             |          |            |            | <i>Pseudotsuga menziesii</i> |                                |
| Boise Cascade DC-2          | 48.13196 | -117.96123 | Washington | <i>Abies grandis</i>         | Mee-Sook Kim et al.            |
| Boise Cascade WC-1          | 48.08338 | -118.00094 | Washington | <i>Larix occidentalis</i>    | Mee-Sook Kim et al.            |
| Boise Cascade WT-1          | 48.099   | -117.99414 | Washington | <i>Tsuga heterophylla</i>    | Mee-Sook Kim et al.            |
| WW029R (Falls View 2R)      | 47.79067 | -122.92543 | Washington | <i>Pseudotsuga menziesii</i> | John Hanna                     |
| WW099R (Canyon Creek 1R)    | 47.96597 | -123.20031 | Washington | <i>Alnus</i> sp.             | John Hanna                     |
| Abbott Creek - NA99         | 42.9261  | -122.53314 | Oregon     | <i>Abies grandis</i>         | Geral McDonald et al.          |
| N.Fork Nooksack (NA236)     | 48.909   | -121.74624 | Washington | <i>Abies magnifica</i>       | Geral McDonald et al.          |
| Ochoco Divide (NA87)        | 44.47977 | -120.34733 | Oregon     | <i>Abies grandis</i>         | Geral McDonald et al.          |
| Pringle Falls (NA130)       | 43.7043  | -121.61574 | Oregon     | <i>Abies grandis</i>         | Geral McDonald et al.          |
| Steamboat Mountain (NA149)  | 46.13315 | -121.7261  | Washington | <i>Abies magnifica</i>       | Geral McDonald et al.          |
| T.T. Munger (NA135)         | 45.81448 | -121.96985 | Washington | <i>Acer circinatum</i>       | Geral McDonald et al.          |
| D85                         | 47.73524 | -116.51237 | Idaho      | soil                         | Geral McDonald et al.          |
| Ida Creek                   | 48.36319 | -116.82436 | Idaho      | <i>Abies grandis</i>         | Geral McDonald et al.          |
|                             |          |            |            | <i>Pinus monticola</i>       |                                |
| Pete's Creek                | 46.80236 | -116.16285 | Idaho      | <i>Amelanchier alnifolia</i> | Geral McDonald et al.          |
|                             |          |            |            | <i>Larix occidentalis</i>    |                                |
|                             |          |            |            | <i>Pinus monticola</i>       |                                |
|                             |          |            |            | <i>Pseudotsuga menziesii</i> |                                |
|                             |          |            |            | <i>Thuja plicata</i>         |                                |
|                             |          |            |            | <i>Vaccinium globulare</i>   |                                |
| Vasser Meadows              | 46.84651 | -116.54166 | Idaho      | <i>Abies grandis</i>         | Geral McDonald et al.          |
|                             |          |            |            | detritus                     |                                |
|                             |          |            |            | soil                         |                                |
| Wet Meadows                 | 46.86356 | -116.52895 | Idaho      | <i>Abies grandis</i>         | Geral McDonald et al.          |
|                             |          |            |            | <i>Menziesia ferruginea</i>  |                                |
|                             |          |            |            | soil                         |                                |
| Jarbidge River              | 41.80245 | -115.40255 | Nevada     | <i>Abies lasiocarpa</i>      | John Hanna and Patrick Bennett |
|                             |          |            |            | <i>Pinus albicaulis</i>      |                                |
|                             |          |            |            | <i>Populus tremuloides</i>   |                                |
| King's Canyon (1R)          | 39.12504 | -119.88329 | Nevada     | <i>Pinus jeffreyi</i>        | John Hanna and Sara Ashiglar   |
| Boulder Creek ID (1F)       | 45.14788 | -116.4006  | Idaho      | <i>Pseudotsuga menziesii</i> | John Hanna                     |
| Boulder Creek ID (2F)       | 45.10132 | -116.44014 | Idaho      | <i>Pseudotsuga menziesii</i> | John Hanna                     |
| Cold Springs Saddle (2R)    | 44.5666  | -116.21201 | Idaho      | <i>Populus trichocarpa</i>   | John Hanna                     |
| Trail Creek (1R)            | 45.14895 | -116.34777 | Idaho      | <i>Abies grandis</i>         | John Hanna                     |
| E. Branch Weiser River (1R) | 45.05525 | -116.43622 | Idaho      | <i>Abies grandis</i>         | John Hanna                     |
| Hard Creek (1R)             | 45.15756 | -116.16821 | Idaho      | <i>Populus trichocarpa</i>   | John Hanna                     |
| Last Chance (2R)            | 44.99791 | -116.19721 | Idaho      | <i>Pseudotsuga menziesii</i> | John Hanna                     |
| Little Goose Creek (1R)     | 44.95815 | -116.17284 | Idaho      | <i>Abies grandis</i>         | John Hanna                     |
| Mica Creek (1R)             | 44.61055 | -116.23905 | Idaho      | <i>Abies grandis</i>         | John Hanna                     |
| Outlet Creek (1R)           | 45.09509 | -116.02855 | Idaho      | <i>Abies lasiocarpa</i>      | John Hanna                     |

|                         |          |            |            |                              |                                |
|-------------------------|----------|------------|------------|------------------------------|--------------------------------|
| Pearl Creek (1F)        | 45.0894  | -116.04496 | Idaho      | <i>Abies lasiocarpa</i>      | John Hanna                     |
| Pine Creek ID (1R)      | 43.77963 | -115.79341 | Idaho      | <i>Populus trichocarpa</i>   | John Hanna                     |
| No Business (2R and 2F) | 44.7496  | -116.18869 | Idaho      | <i>Abies grandis</i>         | John Hanna                     |
| No Business (3F)        | 44.74962 | -116.18867 | Idaho      | <i>Abies grandis</i>         | John Hanna                     |
| Sand Pit (1R)           | 44.99841 | -116.06029 | Idaho      | <i>Picea engelmannii</i>     | John Hanna                     |
| Shovel Creek 1F         | 41.81837 | -122.19527 | California | <i>Abies concolor</i>        | John Hanna and Patrick Bennett |
| Rat Trap Gap 1R         | 40.20723 | -122.94346 | California | <i>Pseudotsuga menziesii</i> | John Hanna and Patrick Bennett |
| Northgate 1R            | 41.47206 | -122.18864 | California | rotten stump                 | John Hanna and Patrick Bennett |
| McMullen 1R             | 40.64297 | -121.69852 | California | <i>Abies concolor</i>        | John Hanna and Patrick Bennett |
| Jack's Backbone 1R      | 40.66402 | -121.66862 | California | <i>Abies concolor</i>        | John Hanna and Patrick Bennett |

---
